# Supplementary material for: P[8] and P[4] Rotavirus Infection Associated with Secretor Phenotypes Among Children in South China
Source: PubMed Central journal article supplement (PMC5052604; doi:10.1038/srep34591), 2016-10-06
Supplement: srep34591-s1.pdf [file srep34591-s1.pdf]

**P[8] and P [4] Rotavirus Infection Associated with Secretor Phenotypes Among  
Children in South China**

Xu-Fu Zhang<sup>1†</sup>, Yan Long<sup>1†</sup>, Ming Tan<sup>3,4</sup>, Ting Zhang<sup>2</sup>, Qiong Huang<sup>5</sup>, Xi Jiang<sup>3,4</sup>,  
Wen-Fang Tan<sup>1</sup>, Jian-Dong Li<sup>2</sup>, Gui-Fang Hu<sup>2</sup>, Shixing Tang<sup>2</sup>, Ying-Chun Dai<sup>2,\*</sup>

**Supplement Table 1: Study population demographics**

| <b>Group</b>                                                                                   | <b>Sample collection</b> | <b>No. of male</b> | <b>No. of female</b> | <b>Range of age</b>     | <b>Median of age</b> |
|------------------------------------------------------------------------------------------------|--------------------------|--------------------|----------------------|-------------------------|----------------------|
| <b>Cases:</b><br>RV infection GE patients                                                      | Stool sample<br>Saliva   | 44                 | 31                   | 3 month-10<br>years old | 1.8 years old        |
| <b>Internal control:</b> RV/NoV<br>negative GE patients                                        | Stool sample<br>Saliva   | 89                 | 62                   | 2 month- 9<br>years old | 2.1 years old        |
| <b>Healthy control:</b> children<br>in a primary school                                        | Saliva                   | 98                 | 71                   | 6-9 years old           | 6.7 years old        |
| <b>Serological study:</b> 206<br>persons (103 from<br>Magong and 103 from<br>Hongsao districts | Saliva<br>Serum          | 78                 | 128                  | 3-88 years old          | 51.2 years old       |
